# Supplementary material for: Silent Raman imaging of highly effective anti-bacterial activity synchronous with biofilm breakage using poly(4-cyanostyrene)@silver@polylysine nanocomposites
Source: Royal Society of Chemistry journal article supplement (doi:10.1039/d2an01831d), 2022-12-22
Supplement: d2an01831d1.pdf [file d2an01831d1.pdf]

**Silent Raman imaging of highly effective anti-bacteria activity  
synchronously with biofilm breakage using poly(4-cyanostyrene)  
@silver@polylysine nanocomposites**

Wei Zhu,<sup>a</sup> Jing-Yi Tang,<sup>a</sup> Dong Yu,<sup>a</sup> and Ai-Guo Shen<sup>\*a,b</sup>

<sup>a</sup> Research Center of Graphic Communication, Printing and Packaging, Wuhan University,  
430079, PR China.

<sup>b</sup> College of Chemistry and Chemical Engineering, Wuhan Textile University, Wuhan 430200,  
PR China.

\* Corresponding author: [agshen@whu.edu.cn](mailto:agshen@whu.edu.cn) (Ai-Guo Shen).

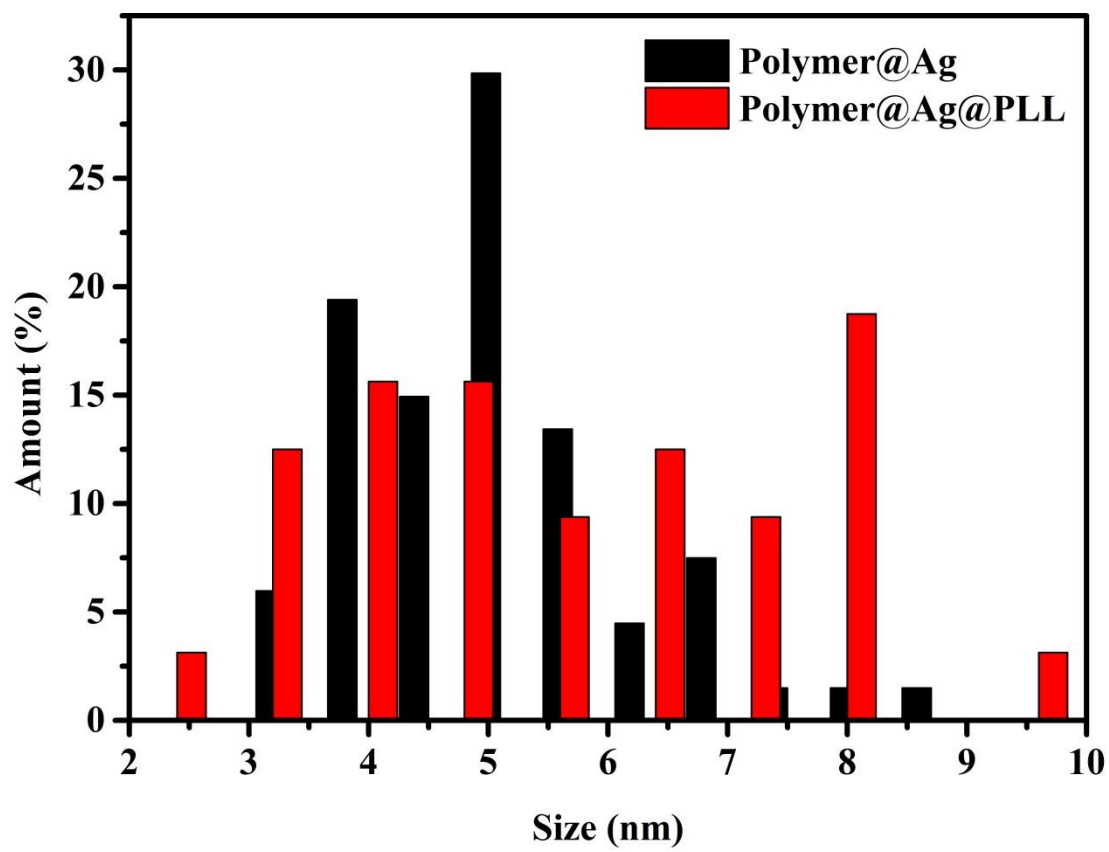

Fig. S1 The average diameter statistics of Ag nanoparticles from Polymer@Ag nanocomposites and Polymer@Ag@PLL nanocomposites using the particle size distribution software.

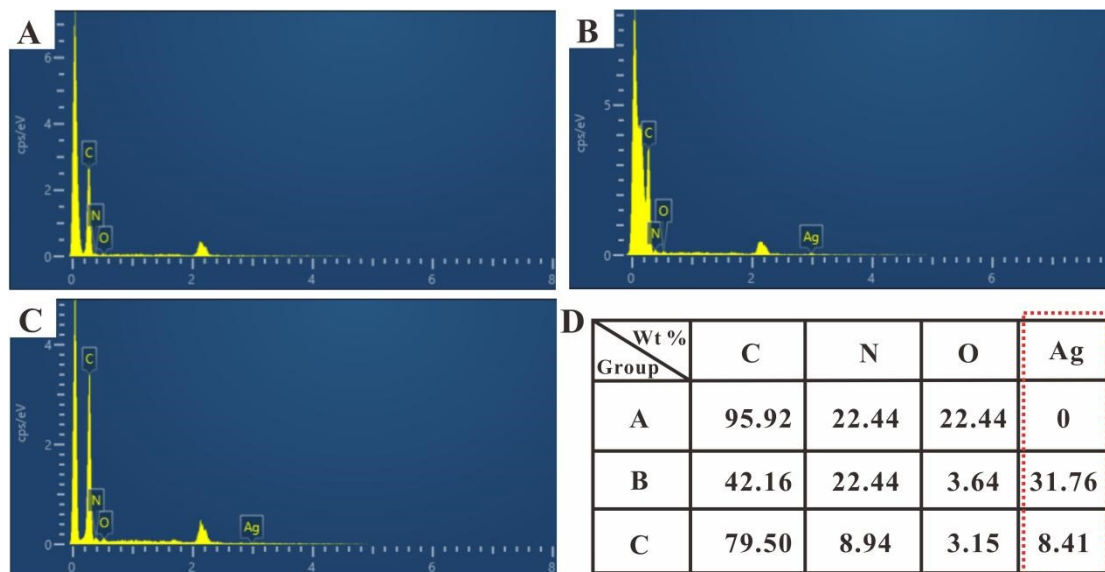

**Fig. S2** EDS spectra of poly(4-cyanostyrene) NPs (A), Polymer@Ag nanocomposites (B), and Polymer@Ag@PLL nanocomposites (C). (D) The weight proportion of each element, A-C represents poly(4-cyanostyrene) NPs, Polymer@Ag nanocomposites, and Polymer@Ag@PLL nanocomposites, respectively.

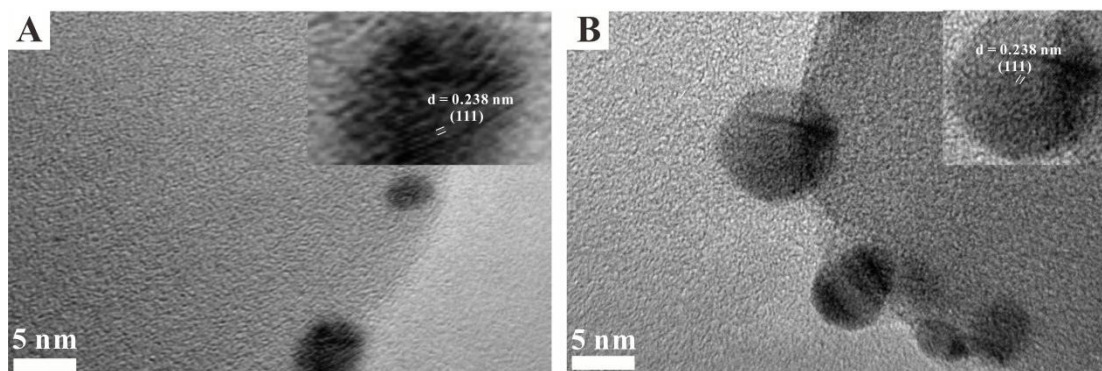

**Fig. S3** (A) High-resolution TEM image of Polymer@Ag nanocomposites. (B) High-resolution TEM image of Polymer@Ag@PLL nanocomposites.

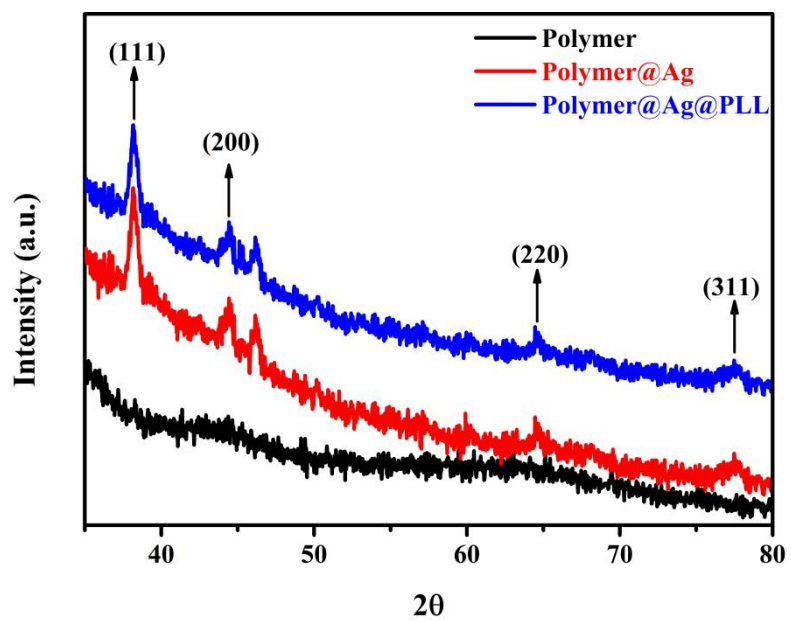

Fig. S4 XRD patterns of Polymer (poly(4-cyanostyrene), Polymer@Ag, and Polymer@Ag@PLL.

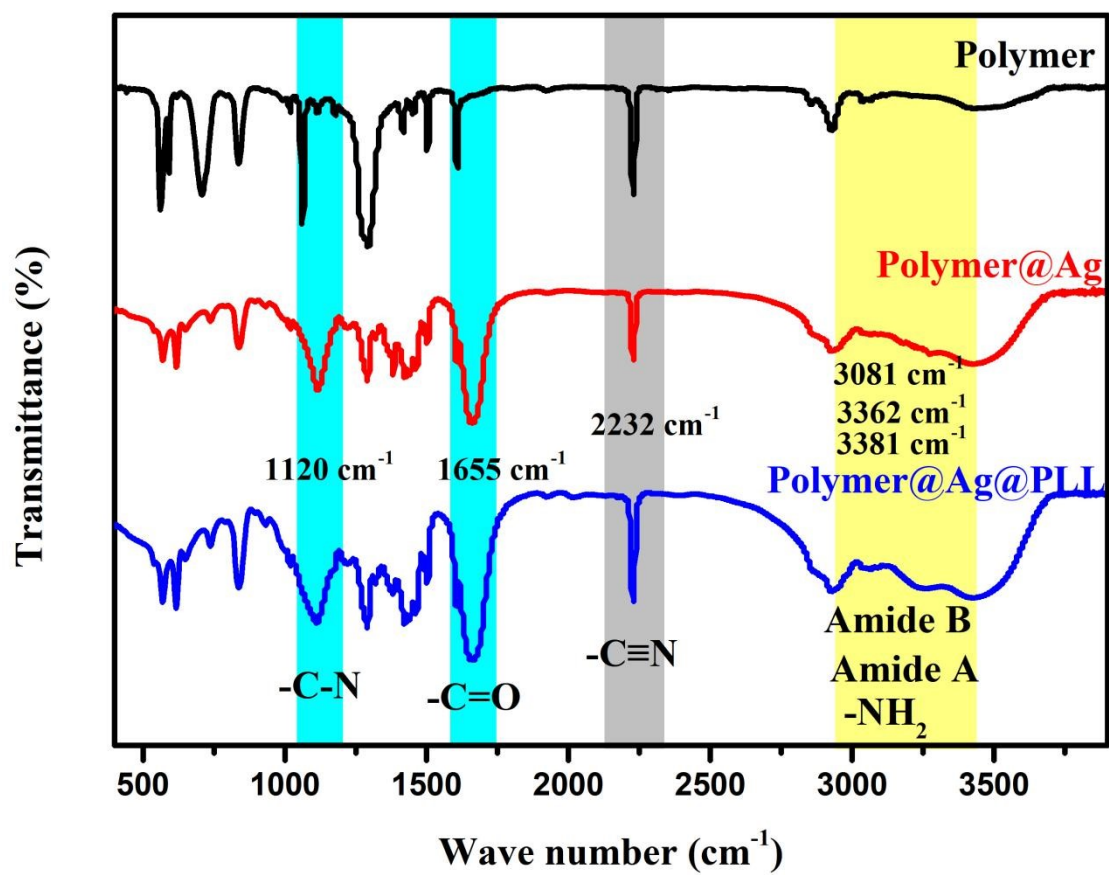

Fig. S5 FT-IR spectra of Polymer (poly(4-cyanostyrene)), Polymer@Ag, and Polymer@Ag@PLL.

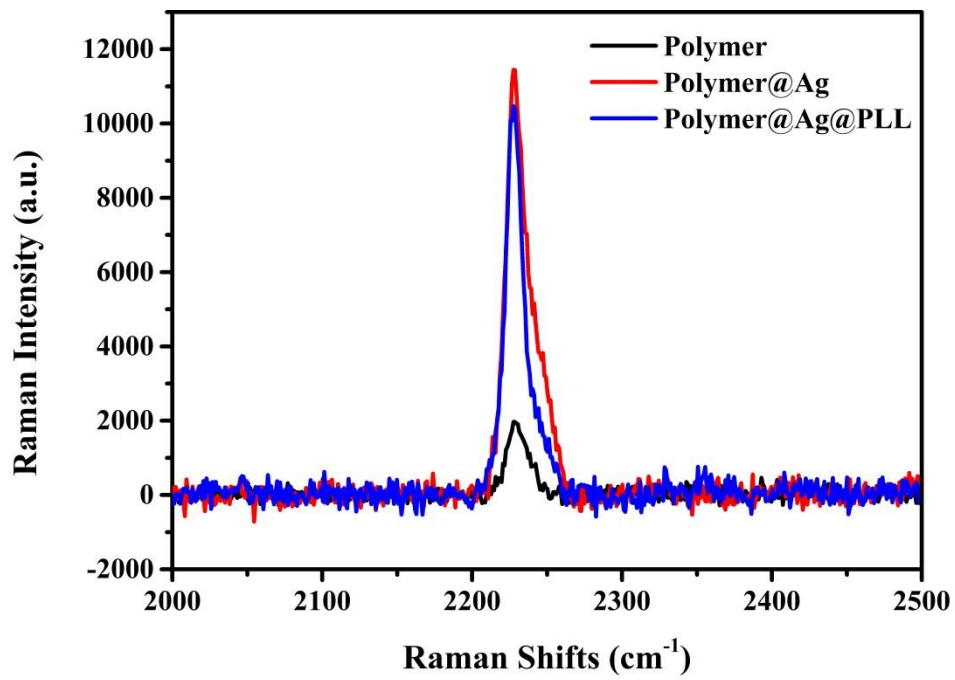

Fig. S6 Raman spectra of Polymer (poly(4-cyanostyrene)), Polymer@Ag, and Polymer@Ag@PLL.

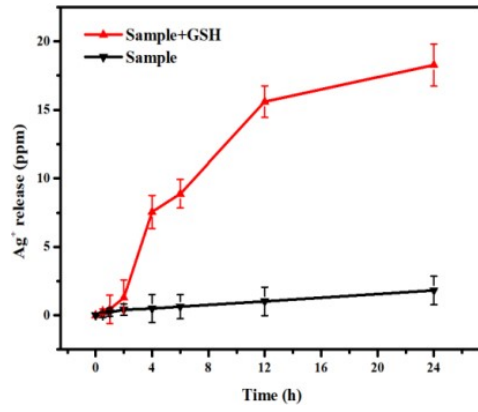

Fig. S7 Ag<sup>+</sup> releasing from Sample with GSH triggering, Sample: polymer@Ag@PLL nanocomposites.



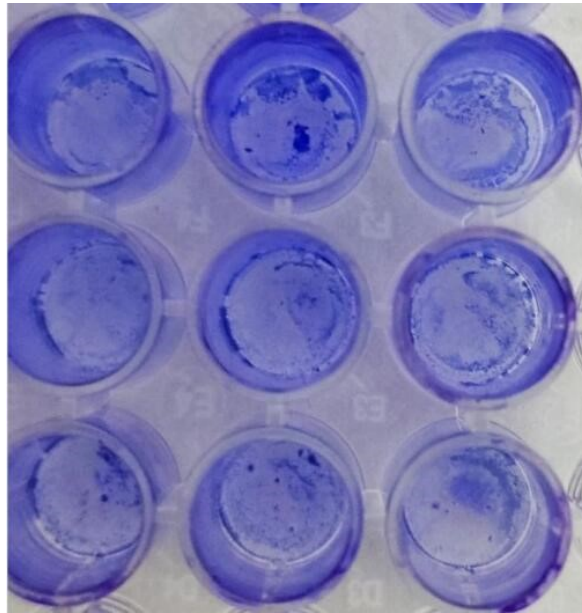

Fig. S8 Digital images of bacterial biofilms formation by CV staining.

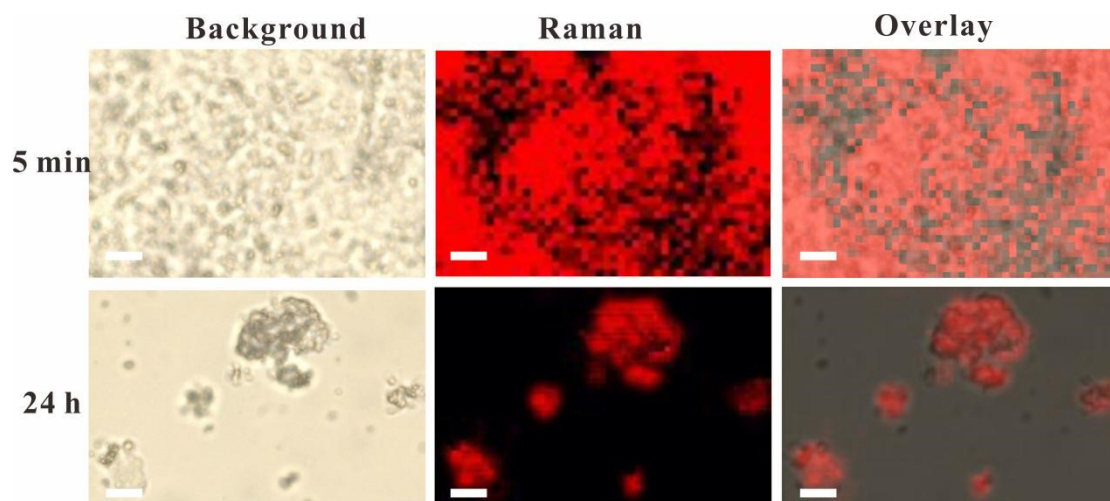

Fig. S9 Raman imaging of *S. aureus*' bacterial biofilm with Polymer@Ag@PLL nanocomposites incubation for 5 min and 24 h (scale bar: 20  $\mu\text{m}$ ).
